# Supplementary material for: A new highly Zn2+-selective and “off–on” fluorescent chemosensor based on the pyrene group
Source: Royal Society of Chemistry journal article supplement (doi:10.1039/c5ay01276g), 2015-01-01
Supplement: c5ay01276g1.pdf [file c5ay01276g1.pdf]

## Supporting Information

# A New Highly Zn<sup>2+</sup>-Selective and “Off-On” Fluorescent Chemosensor Based on Pyrene Group

Cunji Gao<sup>a</sup>, Hongmei Zhu<sup>b</sup>, Mingling Zhang<sup>a</sup>, Ting Tan<sup>a</sup>, Jia Chen<sup>a</sup>, Hongdeng Qiu<sup>a\*</sup>

<sup>a</sup>Key Laboratory of Chemistry of Northwestern Plant Resources and Key Laboratory for Natural Medicine of Gansu Province, Lanzhou Institute of Chemical Physics, Chinese Academy of Sciences, Lanzhou 730000, China.

<sup>b</sup>Institute of Microbiology and Biochemical Pharmacy, School of Pharmacy, Lanzhou University, Lanzhou 730000, P. R. China

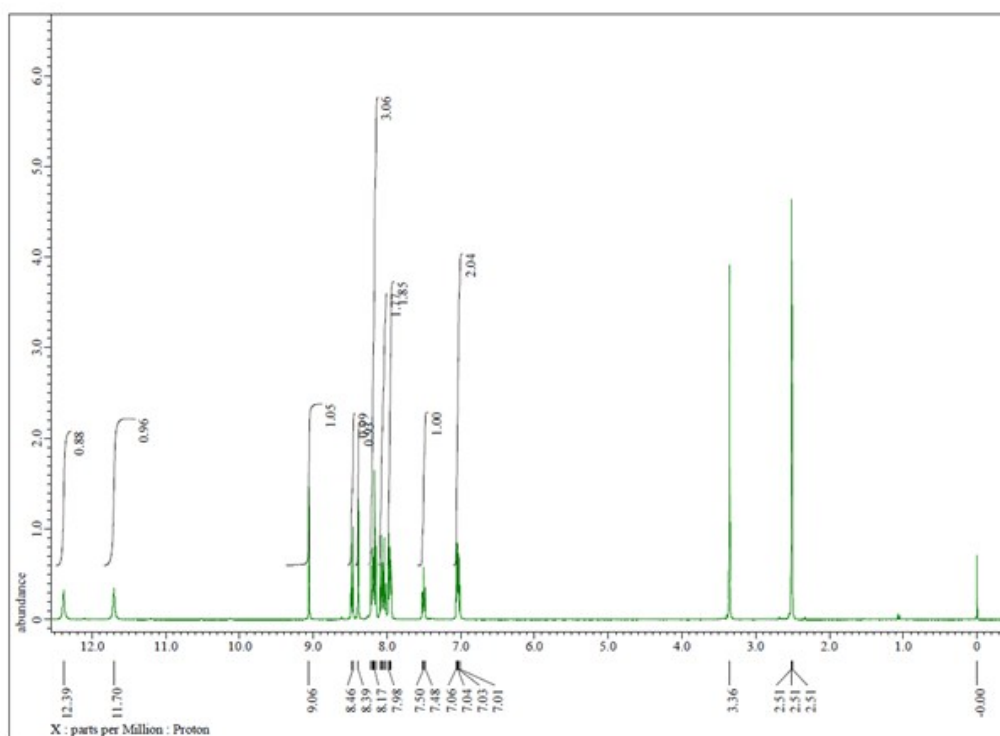

**Figure S1.** The <sup>1</sup>H NMR spectrum of the fluorescent chemosensor **H**<sub>2</sub>**L** in *d*<sub>6</sub>-DMSO.

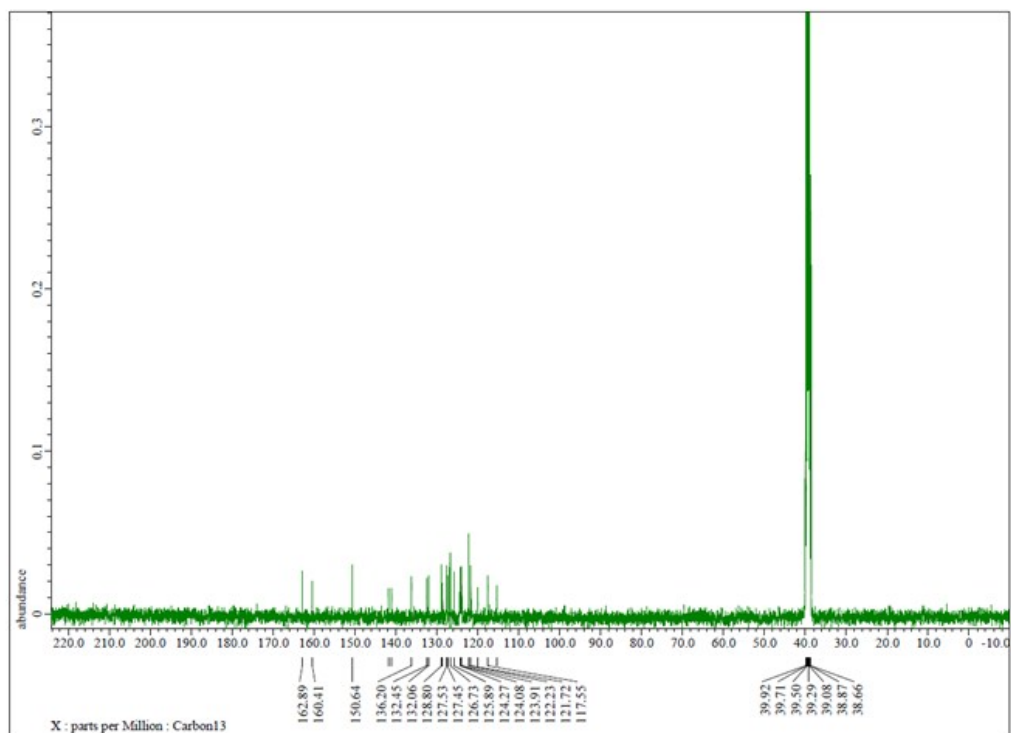

**Figure S2.** The  $^{13}\text{C}$  NMR spectrum of the fluorescent chemosensor  $\text{H}_2\text{L}$  in  $d_6$ -DMSO.

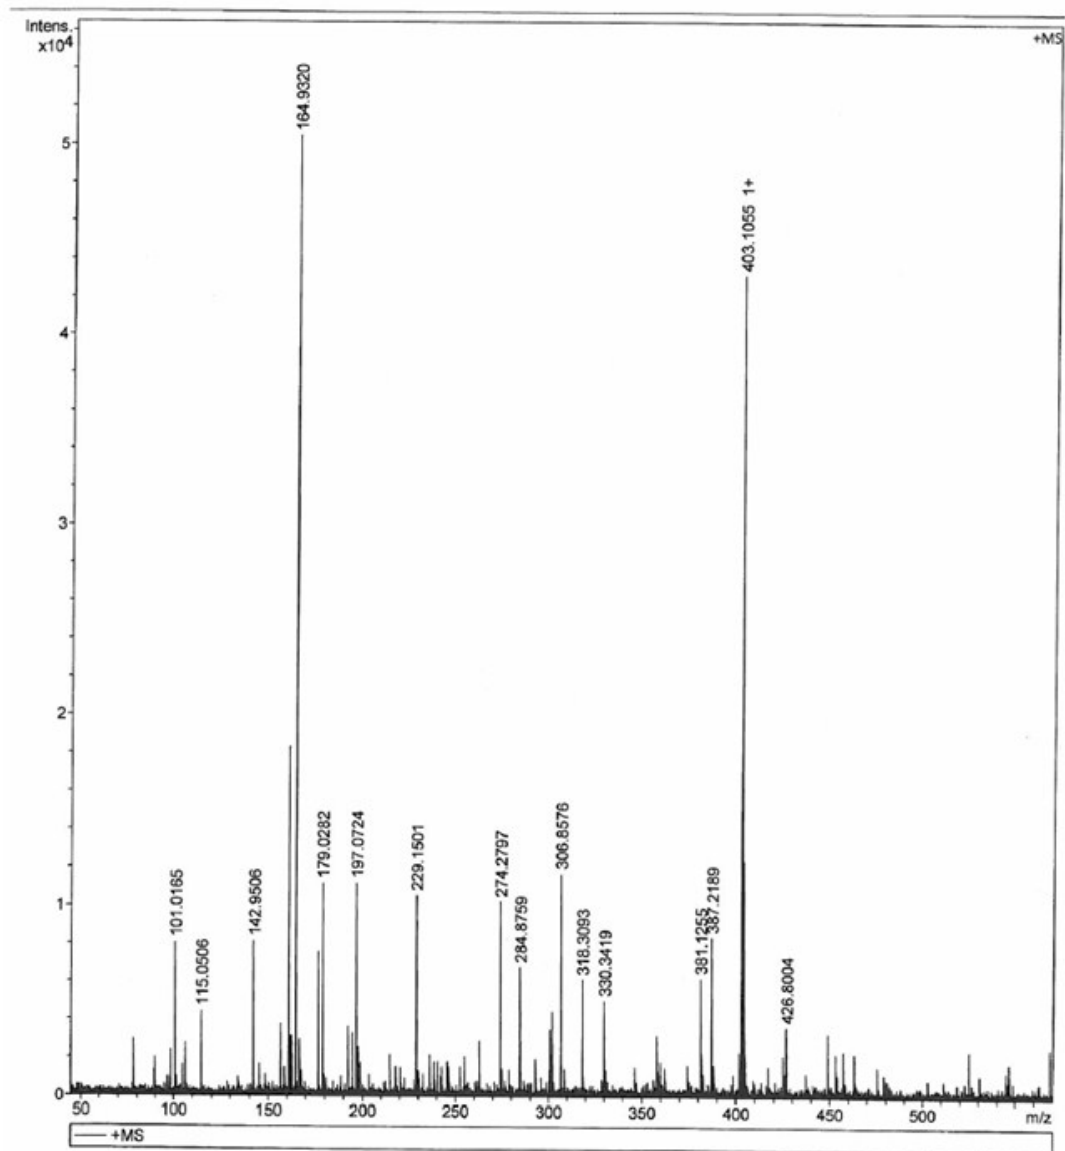

Figure S3. The MS spectrum of chemosensor  $H_2L$ .

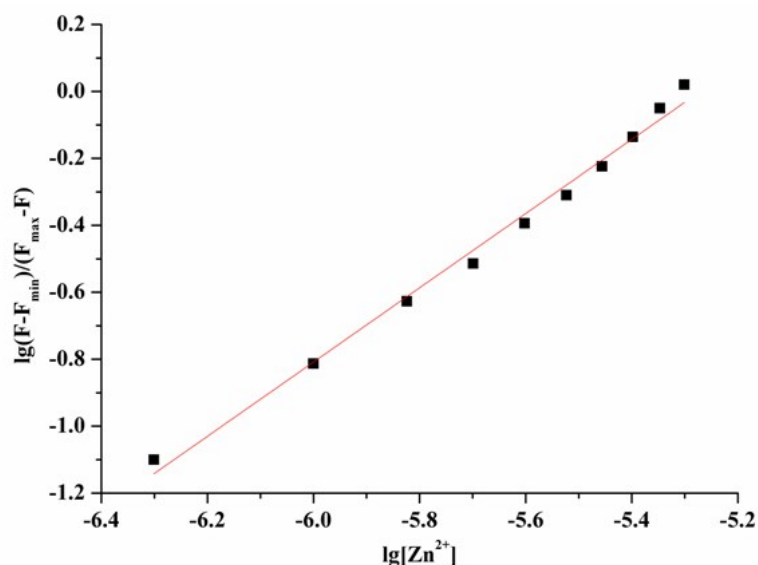

**Figure S4.** Fluorescence intensity of  $\text{H}_2\text{L}$  versus increasing concentration of  $\lg[\text{Zn}^{2+}]$ .  $\lambda_{\text{ex}} = 490$  nm, the concentration of  $\text{H}_2\text{L}$  was  $5 \mu\text{M}$ . The fluorescence response fits to a Hill coefficient of 1 (1.0317); It is consistent with the formation of the  $\text{L}-\text{Zn}$  complex is 1:1 in solution.

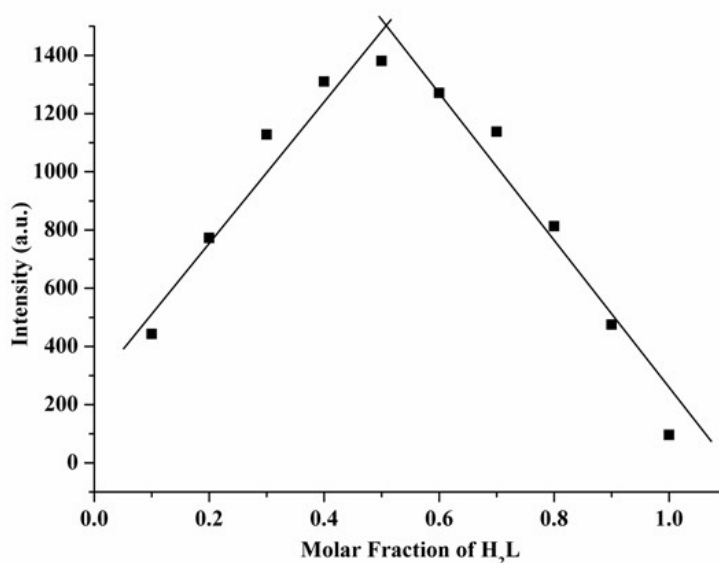

**Figure S5.** Job's plot for  $\text{H}_2\text{L}$  (forms 1:1 complex) in Tris-HCl (20 mM, pH 7.36),  $\text{CH}_3\text{CN}/\text{H}_2\text{O}$  (1:1, v/v). The total  $[\text{H}_2\text{L}] + [\text{Zn}^{2+}] = 20 \mu\text{M}$ .

#### Calculation of detection limit <sup>[S1,S2]</sup>

The detection limit was determined from the fluorescence titration data based on a reported method. <sup>[S1,S3]</sup> According to the result of titrating experiment, the fluorescence intensity data at 556 nm were normalized between the minimum intensity and the maximum intensity. A linear regression curve was then fitted to these normalized fluorescence intensity data, and the point at which this line crossed the ordinate axis was considered as the detection limit.

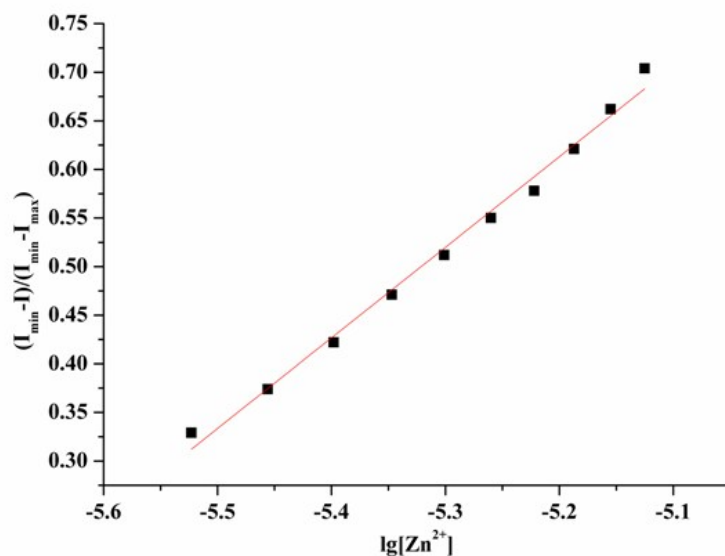

**Figure S6.** Fluorescence intensity of **H<sub>2</sub>L** in Tris-HCl (20 mM, pH 7.36), CH<sub>3</sub>CN/H<sub>2</sub>O (1:1, v/v),  $\lambda_{em}$  = 556 nm at each concentration of Zn<sup>2+</sup> added. The detection limit (LOD) was measured to be  $1.38 \times 10^{-6}$  M.

## References

- [S1] M. Shortreed, R. Kopelman, M. Kuhn, B. Hoyland, *Anal. Chem.* 1996, **68**, 1414–1418.
- [S2] H. H. Wang, L. Xue, H. Jiang, *Org. Lett.* 2011, **13**, 3844–3847.
- [S3] W. H. Wang, O. Rusin, X. Y. Xu, K. K. Kim, J. O. Escobedo, S. O. Fakayode, K. A. Fletcher, M. Lowry, C. M. Schowalter, C. M. Lawrence, F. R. Fronczek, I. M. Warner, R. M. Strongin, *J. Am. Chem. Soc.* 2005, **127**, 15949–15958.
